# Supplementary material for: Changes in pigment, spectral transmission and element content of pink chicken eggshells with different pigment intensity during incubation
Source: PeerJ. 2016 Mar 17;4:e1825. doi: 10.7717/peerj.1825 (PMC4806607; doi:10.7717/peerj.1825)
Supplement: Supplemental Information 1 [file peerj-04-1825-s001.xlsx]

## Sheet: element content of eggshell
number	sample 1	smple 2	day	weight(g)	Na	%	P	%	Ca	%	K	%	Mg	%
1	Y144	Y132	0L	0.0601	1.146	0.09401	1.585	0.131864	478.17	39.7709	0.602	0.0476705	5.282	0.438852
2	Y66	Y50	0L	0.0627	1.252	0.0985646	1.786	0.142424	490.14	39.0762	0.631	0.0480064	5.272	0.419856
3	Y124	Y43	0L	0.0541	1.158	0.105545	1.474	0.136229	413.07	38.1651	0.522	0.0455638	5.445	0.502588
4	Y151	Y59	0D	0.0619	1.067	0.084895	1.614	0.130372	496.86	40.1241	0.585	0.0449111	4.949	0.399192
5	Y152	Y141	0D	0.0499	1.087	0.107315	1.346	0.13487	383.25	38.3894	0.493	0.046493	4.776	0.477856
6	Y267	Y178	0D	0.0496	1.101	0.109375	1.427	0.143851	387.45	39.045	0.533	0.0508065	4.86	0.489214
7	Y235	Y292	0M	0.0476	1.147	0.118803	1.005	0.105567	402.99	42.3179	0.499	0.0493697	3.775	0.395798
8	Y2	Y200	0M	0.0473	0.985	0.102431	1.395	0.147463	395.43	41.7871	0.49	0.0487315	3.831	0.404228
9	Y281	Y264	0M	0.0483	1.074	0.109524	1.102	0.114079	373.8	38.6828	0.475	0.0461698	4.565	0.471843
10	Y139	Y140	4L	0.0501	1.087	0.106886	1.632	0.162874	382.41	38.1523	0.6	0.056986	5.127	0.510978
11	Y97	Y260	4L	0.0479	0.93	0.0954071	1.349	0.140814	369.6	38.5674	0.454	0.0443633	4.234	0.441232
12	Y83	Y85	4L	0.0494	1.002	0.0997976	1.232	0.124696	367.08	37.1413	0.531	0.0508097	4.377	0.442308
13	Y109	Y247	4M	0.0496	1.087	0.107964	1.422	0.143347	382.41	38.5369	0.499	0.047379	4.506	0.453528
14	Y67	Y298	4M	0.0511	1.045	0.100685	1.508	0.147554	392.49	38.392	0.563	0.0522505	4.659	0.455186
15	Y223	Y296	4M	0.0526	1.103	0.103327	1.467	0.139449	398.37	37.8561	0.575	0.0519011	4.672	0.443441
16	Y88	Y27	4D	0.0566	1.105	0.0962014	1.667	0.147261	434.49	38.3716	0.608	0.0511484	5.166	0.455742
17	Y3	Y34	4D	0.0487	0.932	0.0940452	1.548	0.158932	376.32	38.6238	0.501	0.04846	4.372	0.448152
18	Y9	Y227	4D	0.0477	0.88	0.090566	1.368	0.143396	367.08	38.465	0.439	0.0429769	3.974	0.415828
19	Y233	Y172	8L	0.0462	0.785	0.0832251	1.284	0.138961	353.64	38.2593	0.357	0.0354978	3.683	0.397835
20	Y213	Y154	8L	0.0478	1.09	0.112343	1.501	0.157008	354.27	37.0446	0.47	0.0461297	4.797	0.501046
21	Y163	Y106	8L	0.0484	0.956	0.0971074	1.313	0.13564	367.71	37.9738	0.428	0.041219	4.482	0.462293
22	Y26	Y23	8M	0.0485	0.98	0.0993814	1.476	0.152165	362.67	37.3759	0.465	0.0449485	4.849	0.499175
23	Y158	Y182	8M	0.0507	1.192	0.115976	1.664	0.164103	435.33	42.9197	0.6	0.0563116	5.582	0.549803
24	Y209	Y210	8M	0.0484	1.035	0.105269	1.504	0.155372	368.13	38.0171	0.457	0.0442149	4.352	0.448864
25	Y219	Y229	8D	0.0474	0.954	0.0989451	1.276	0.134599	359.73	37.9331	0.396	0.0387131	4.208	0.443143
26	Y103	Y130	8D	0.0558	1.074	0.0948029	1.551	0.138978	420	37.6233	0.496	0.0418459	4.433	0.396595
27	Y4	Y224	8D	0.0501	0.973	0.095509	1.47	0.146707	385.14	38.4248	0.505	0.047505	4.988	0.497106
28	Y62	Y81	12L	0.0525	1.224	0.115048	1.394	0.132762	395.22	37.6282	0.506	0.0454286	5.645	0.536952
29	Y20	Y28	12L	0.0475	0.962	0.0995789	1.46	0.153684	367.08	38.6269	0.493	0.0488421	4.826	0.507263
30	Y46	Y37	12L	0.0495	1.048	0.104242	1.37	0.138384	380.31	38.4026	0.446	0.0421212	4.716	0.475657
31	Y24	Y280	12M	0.0478	1.051	0.108264	1.573	0.16454	350.91	36.6931	0.475	0.0466527	4.558	0.476046
32	Y95	Y278	12M	0.0478	1.063	0.109519	1.364	0.142678	357.84	37.418	0.41	0.0398536	4.119	0.430126
33	Y253	Y275	12M	0.0498	0.896	0.0883534	1.511	0.151707	376.53	37.7918	0.451	0.0423695	4.596	0.460743
34	Y19	Y211	12D	0.0492	0.89	0.0888211	1.252	0.127236	375.06	38.1033	0.4	0.0377033	3.676	0.372866
35	Y22	Y212	12D	0.0489	0.898	0.090184	1.381	0.141207	357	36.4904	0.342	0.0320041	3.508	0.357975
36	Y187	Y175	12D	0.0492	0.907	0.0905488	1.619	0.164533	382.62	38.8715	0.43	0.040752	3.726	0.377947
37	Y197	Y221	16L	0.0474	0.957	0.0992616	1.26	0.132911	360.57	38.0217	0.497	0.0493671	4.475	0.471308
38	Y86	Y129	16L	0.0505	1.026	0.1	1.951	0.193168	385.98	38.2036	0.493	0.0459406	5.407	0.534653
39	Y114	Y126	16L	0.0565	1.094	0.0953982	1.641	0.145221	434.07	38.4023	0.509	0.0424779	5.326	0.470708
40	Y133	Y136	16M	0.0462	0.839	0.0890693	1.549	0.167641	353.01	38.1911	0.413	0.0415584	4.389	0.474242
41	Y153	Y243	16M	0.0495	0.949	0.0942424	1.642	0.165859	373.59	37.7238	0.449	0.0424242	4.517	0.455556
42	Y254	Y122	16M	0.0475	0.841	0.0868421	1.234	0.129895	357.84	37.6543	0.401	0.0391579	3.761	0.395158
43	Y58	Y128	16D	0.0524	1.058	0.0994275	1.789	0.170706	393.33	37.5197	0.538	0.0485687	5.41	0.515553
44	Y177	Y63	16D	0.0469	0.855	0.0894456	1.33	0.141791	356.58	38.0017	0.387	0.0381663	4.163	0.44307
45	Y131	Y203	16D	0.0501	0.923	0.090519	1.232	0.122954	380.1	37.9218	0.44	0.041018	4.387	0.437126
46	Y20	Y58	21L	0.0504	0.955	0.0931548	1.264	0.125397	388.5	38.5294	0.439	0.0406746	4.146	0.410615
47	Y52	Y297	21L	0.0524	0.798	0.0746183	1.766	0.168511	395.43	37.72	0.378	0.0333015	4.282	0.40792
48	Y16	Y299	21L	0.0596	1.092	0.0902685	2.064	0.173154	445.2	37.3386	0.494	0.0390101	5.684	0.476258
49	Y120	Y105	21M	0.052	0.959	0.0906731	2.104	0.202308	403.2	38.7573	0.454	0.0408654	4.96	0.47625
50	Y84	Y169	21M	0.0524	1.018	0.0956107	1.371	0.130821	395.22	37.7	0.465	0.0416031	4.461	0.425
51	Y96	Y5	21M	0.0528	0.944	0.0878788	1.53	0.144886	407.4	38.5678	0.429	0.0378788	4.662	0.440814
52	Y56	Y56（？）	21D	0.0492	0.999	0.0998984	1.717	0.174492	376.53	38.2526	0.452	0.0429878	4.728	0.479776
53	Y117	Y194	21D	0.0625	1.064	0.08384	1.472	0.11776	482.16	38.5629	0.478	0.03592	5.141	0.41072
54	Y53	Y181	21D	0.0498	0.918	0.0905622	1.267	0.127209	380.1	38.1502	0.367	0.0339357	3.954	0.396285

## Sheet: classification of eggs
light intensity pigment							medium intensity pigment
egg number	average△E	egg number	average△E	egg number	average△E		egg number	average△E	egg number	average△E	egg number	average△E
8	22.1333	100	17.38	232	18.5033		2	26.0333	137	22.72	279	25.21
10	17.9	106	22.1267	233	15.56		5	26.8567	143	23.6	280	27.8367
11	16.9633	111	11.72	238	17.8267		6	26.0367	147	27.3033	281	27.9433
12	22.0033	112	19.5167	239	21.2067		7	22.5767	149	24.59	282	22.5433
13	18.5867	113	20.8633	241	18.5767		18	27.8033	150	27.4067	283	24.4
14	16.7167	114	19.8	242	14.8433		23	25.49	153	23.1233	284	23.36
15	22.4867	115	22.4333	251	16.8267		24	26.6433	156	27.0667	287	22.9067
16	12.6267	116	19.74	256	20.4		26	25.25	158	24.0567	288	26.0133
17	21.93	121	18.4833	259	21.8633		29	23.2467	159	23.4867	289	26.72
20	16.2433	124	21.5333	260	22.35		31	23.7533	167	25.1867	291	23.2167
21	17.02	126	15.64	262	19.3967		32	26.5933	168	28.03	292	24.1467
25	14.61	129	22.3533	266	14.2167		36	26.15	169	26.7633	293	25.9633
28	20.0933	138	17.8167	268	20.2967		39	26.6467	180	24.01	294	23.81
30	14.33	139	20.8633	272	21.8533		41	25.17	182	28.0033	295	26.3733
37	22.09	140	21.3533	273	21.6233		42	26.2033	190	27.8933	296	27.21
40	20.32	142	20.1867	274	20.9733		45	27.6833	200	25.7267	298	25.5167
43	20.6	144	19.79	297	20.7433		54	22.66	206	27.48
44	21.08	146	20.02	299	20.3667		55	23.28	207	22.7567
46	16.23	148	15.6067				65	23.35	209	25.5867
47	15.3267	154	21.22				67	26.2733	210	25.05
48	21.89	162	17.9133				78	27.1433	216	23.41
50	21.5767	163	20.8533				84	25.5433	223	24.9333
52	14.9133	164	20.65				91	26.33	230	25.92
57	19.7367	170	18.26				92	24.1533	234	25.6133
62	20.2767	171	22.45				95	26.6867	235	24.32
64	16.1567	172	19.6833				96	26.2867	237	27.5567
66	11.9033	174	22.2567				98	25.3333	243	27.1933
68	21.0567	183	19.39				102	22.5733	246	27.5033
69	21.4067	185	18.5				105	27.53	247	25.4967
72	22.02	186	19.3267				107	23.6267	248	26.26
75	21.47	188	20.2867				109	27.86	249	22.8967
77	20.9933	197	20.4133				110	26.7667	253	25.97
81	20.8933	198	20.0367				119	23.7433	254	23.0867
82	19.5733	204	13.7433				120	25.3633	255	24.3767
83	18.9367	205	19.1367				122	26.3033	257	24.04
85	22.4867	213	21.0033				123	26.0467	258	24.5767
86	17.6933	217	16.67				125	22.7633	263	28.1667
89	22.2833	218	15.08				127	25.4633	264	24.17
93	22.2933	220	18.0233				132	24.5067	275	27.13
97	14.3667	221	20.7133				133	24.37	276	23.6433
99	19.6967	231	18.7767				134	26.3533	277	24.1267
							136	27.9833	278	24.5467
dark intensity pigment
egg number	average△E	egg number	average△E	egg number	average△E
1	34.4467	145	29.9633	236	28.3033
3	30.2867	151	29.12	240	32.8233
4	28.6667	152	33.34	244	29.83
9	34.6067	155	29.8233	245	35.7133
19	37.82	157	30.5033	250	107.96
22	29.1133	160	30.15	252	32.7567
27	31.43	161	31.0767	261	31.4633
33	30.09	165	31.88	265	32.1733
34	28.25	166	38.3633	267	29.7933
35	33.76	173	33.8433	269	31.1367
38	29.4833	175	32.8333	270	31.9833
49	28.3533	176	28.2333	271	33.0667
51	28.4233	177	38.2267	285	37.3867
53	29.23	178	30.6367	286	37.1367
56	30.0533	179	31.2733	290	32
58	30.26	181	34.0267	300	29.62
59	29.2267	184	29.83
60	31.6933	187	31.02
61	28.29	189	28.4333
63	31.5	191	28.1733
70	28.9233	192	28.9333
71	28.5767	193	30.2533
73	32.6533	194	33.4167
74	38.8433	195	28.5667
76	30.1933	196	29.73
79	31.2767	199	32.4433
80	30.6233	201	29.6467
87	34.47	202	30.8467
88	36.45	203	37.05
90	30.97	208	35.95
94	30.53	211	30.39
101	30.4467	212	33.63
103	29.9667	214	31.7767
104	37.7667	215	28.43
108	29.0933	219	34.1367
117	32.21	222	40.3133
118	30.5133	224	31.1433
128	36.2467	225	30.5067
130	32.62	226	30.7967
131	28.1967	227	41.38
135	29.5533	228	37.1433
141	32.09	229	33.4333

## Sheet: 0day
egg number	PT				egg weight	pigment intensity of eggshell（0d）												aver△E	thickness of eggshell(data/100)mm												average
						small				middle				lagre					small			average	middle			average	lagre			average
	small	middle	lagre	average		L	a	b	△E	L	a	b	△E	L	a	b	△E
2	22.5905	13.477	13.6798	16.5824	49.4	76.57	6.25	17.71	23.81	75.6	8.42	20.64	26.96	75.19	7.9	21.03	27.33	26.0333	39	39	39	39	36	38	36	36.6667	37	36	36	36.3333	37.4242
21	33.9663	21.313	17.8027	24.3607	40.1	81.18	5	11.67	16.56	80.96	4.85	13.15	17.45	81.51	4.34	13.49	17.05	17.02	35	36	36	35.6667	35	35	35	35	31	30	31	30.6667	34.0606
43	26.9503	10.9894	17.4122	18.4506	48.2	78	3.46	15.35	20.68	81.09	4.93	17.39	19.96	80.14	4.82	18.22	21.16	20.6	32	31	33	32	35	35	35	35	33	33	33	33	33.3636
49	23.0665	15.8537	19.026	19.3154	38.2	73.69	8.86	20.43	28.36	74.96	8.79	18.66	26.38	73.48	9.7	22.95	30.32	28.3533	32	34	36	34	37	37	37	37	35	33	34	34	35.0909
59	33.672	13.3671	18.2881	21.7757	38.2	71.69	8.2	19.92	29.4	72.29	8.57	19.89	29.02	71.12	9.48	20.11	29.26	29.2267	35	36	34	35	32	33	33	32.6667	33	33	34	33.3333	33.697
111	39.5041	15.5863	25.1442	26.7449	41.4	85.79	9	10.26	11.12	84.32	1.53	12.4	11.51	86.75	1.77	13.23	12.53	11.72	25	26	28	26.3333	33	35	32	33.3333	32	32	31	31.6667	30.3333
124	18.3882	16.8265	12.1894	15.8013	42.4	77.06	5.93	14.32	21.51	77.49	5.91	14.6	21.29	77.22	6.26	14.97	21.8	21.5333	35	35	35	35	35	35	35	35	37	36	36	36.3333	35.3636
141	10.6599	8.74142	10.6284	10.0099	43.7	72.54	8.28	23.98	31.21	70.57	8.16	24.72	33.08	71.91	8.34	24.44	31.98	32.09	35	34	36	35	36	36	36	36	35	36	35	35.3333	35.4545
144	14.4215	10.7182	15.3552	13.4983	43.1	79.74	4.11	14.36	18.88	79.81	5.43	16.89	20.68	79.44	5.31	15.04	19.81	19.79	38	38	38	38	33	34	33	33.3333	36	36	37	36.3333	35.8485
152	21.6654	21.6114	28.502	23.9263	39	68.03	11.35	20.68	33.7	69.64	10.54	20.19	31.9	69.19	10.71	24.03	34.42	33.34	33	32	31	32	31	30	31	30.6667	29	30	30	29.6667	30.8788
170	47.5966	27.8137	31.9863	35.7989	35.9	81.97	4.95	17.15	19.22	82.84	4.27	16.38	17.92	83.53	7.07	16.69	17.64	18.26	35	34	33	34	37	36	39	37.3333	39	38	37	38	36.303
176	21.1316	18.5472	12.5855	17.4214	36.7	75.1	5.94	20.32	26.42	75.08	7.61	22.38	28.2	73.03	7.61	23.7	30.08	28.2333	32	32	34	32.6667	34	33	32	33	34	34	33	33.6667	33.0606
178	17.377	13.9719	13.878	15.0756	45.4	71.25	5.65	20.08	29.2	73.3	8.09	22.84	29.89	70.92	8.96	24.22	32.82	30.6367	33	38	37	36	36	36	37	36.3333	34	34	34	34	35.5758
188	10.9968	17.1568	25.5169	17.8902	41.7	79.85	5.84	17.12	20.91	80.83	5.48	17.37	20.28	81.02	5.14	16.79	19.67	20.2867	30	31	30	30.3333	29	31	29	29.6667	28	29	28	28.3333	29.5455
190	17.3031	13.9119	26.2942	19.1697	41.7	74.84	6.21	20.88	27.03	76.17	7.89	22.77	27.79	74.07	7.25	22.46	28.86	27.8933	32	32	31	31.6667	35	34	35	34.6667	32	32	32	32	32.8485
191	19.8998	17.4989	17.339	18.2459	41.4	72.58	9.14	16.93	27.45	73	9.35	17.89	27.66	71.94	9.68	19.45	29.41	28.1733	35	34	34	34.3333	36	35	36	35.6667	35	37	36	36	35.2727
192	22.1074	13.7224	15.0684	16.9661	40.9	72.11	9.56	20.01	29.55	75.07	8.4	17.82	25.69	71.46	9.33	22.78	31.56	28.9333	40	40	42	40.6667	39	39	40	39.3333	35	36	37	36	38.9091
206	30.8236	16.4238	15.7816	21.0097	46.3	72.98	5.03	19.22	27.52	74.34	7.44	21.66	27.59	73.93	6.47	20.16	27.33	27.48	32	32	32	32	35	36	35	35.3333	33	35	33	33.6667	33.6667
216	23.7506	14.7525	10.0782	16.1937	42.6	76.46	7.36	17.32	24.01	75.69	8.12	17.05	24.1	77.18	6.82	15.18	22.12	23.41	36	36	36	36	35	34	35	34.6667	33	33	34	33.3333	34.7879
217	23.2098	21.152	15.7033	20.0217	44.2	81.4	5.25	11.92	16.59	81.86	5.66	12.3	16.56	82.21	5.59	13.4	16.86	16.67	33	34	34	33.6667	34	34	33	33.6667	34	34	33	33.6667	33.6667
232	14.9365	23.84	21.4027	20.0597	45.9	81.18	5.24	16.65	19.56	82.01	5.26	15.88	18.73	82.26	4.51	14.62	17.22	18.5033	35	35	33	34.3333	33	34	34	33.6667	35	34	34	34.3333	34.0909
235	32.8812	13.9976	16.2101	21.0297	42.2	75.61	4.13	18	24.23	77.19	5.66	19.26	24.15	76.74	5.87	19.35	24.58	24.32	36	35	34	35	34	34	33	33.6667	33	35	34	34	34.2424
245	25.4311	14.2763	16.8244	18.8439	42.9	68.74	9.24	23.75	34.14	68.38	9.78	25.76	35.76	67.43	10.29	26.78	37.24	35.7133	37	36	39	37.3333	37	37	37	37	35	35	34	34.6667	36.4848
249	29.8726	19.0249	24.6669	24.5214	42.4	75.59	7.37	18.57	25.38	78.47	6.32	17.65	22.38	78.64	5.33	15.91	20.93	22.8967	34	33	33	33.3333	36	35	36	35.6667	36	37	36	36.3333	35
264	22.2443	16.3429	18.4092	18.9988	44.5	76.73	4.76	19.05	24.15	77.83	5.67	20.34	24.41	77.7	5.55	19.56	23.95	24.17	32	32	33	32.3333	34	35	35	34.6667	32	31	32	31.6667	33
267	15.6608	13.192	13.9	14.2509	45.1	74.31	7.83	21.58	28.29	73.02	9.94	20.22	29.11	72.97	9.78	24.93	31.98	29.7933	36	35	33	34.6667	34	34	35	34.3333	31	30	32	31	33.5455
281	34.0557	22.2564	20.5633	25.6252	37.7	74.75	7.1	23.77	29.22	74.18	5.85	21.5	27.82	76.33	5.89	22.24	26.79	27.9433	30	31	31	30.6667	28	28	26	27.3333	27	28	28	27.6667	28.6364
292	35.689	18.4317	20.0081	24.7096	42	78.29	3.23	19.06	22.72	78.57	5.07	22.65	25.42	79.56	5.65	22.11	24.3	24.1467	30	30	27	29	33	33	34	33.3333	34	32	33	33	31.6667
293	16.9868	15.1998	15.5772	15.9213	45.9	76.63	5.71	18.07	23.84	77.32	7.17	21	25.6	75	8.48	22.29	28.45	25.9633	35	35	35	35	35	37	34	35.3333	36	36	35	35.6667	35.303

## Sheet: 4day
egg number	PT				egg weight	pigment intensity of eggshell（4 d）												aver△E	thickness of eggshell(data/100)mm												average
						small				middle				lagre					small			average	middle			average	lagre
	small	middle	lagre	average		L	a	b	△E	L	a	b	△E	L	a	b	△E
9	18.1205	9.88002	20.9902	16.3303	44.48	69.54	11.53	23.69	34.23	69.59	11.62	22.52	33.52	68.32	11.29	23.3	34.84	34.1967	35	34	35	34.6667	34	34	34	34	32	32	31	31.6667	33.6061
18	19.8371	12.9382	19.6599	17.4784	35.7	74.91	7.27	22.98	28.62	76.59	7.41	21.85	26.74	76.18	7.06	22.18	27.15	27.5033	30	29	29	29.3333	31	31	30	30.6667	29	29	29	29	29.7273
27	26.7163	17.584	19.0303	21.1102	41.4	74.51	8.15	25.73	31.02	75.21	7.85	26.1	30.79	74.37	8.06	26.11	31.36	31.0567	34	36	35	35	36	34	36	35.3333	34	34	35	34.3333	34.9394
34	31.5959	20.0315	27.0709	26.2328	41.37	76.65	5.32	22.86	26.88	76.25	7.25	21.23	26.52	73.03	6.94	22.3	29.44	27.6133	33	32	32	32.3333	33	34	32	33	31	31	31	31	32.2121
35	28.6486	8.55345	18.8777	18.6933	36.48	75.02	7.44	25.51	30.34	72.46	9.75	25.77	32.88	67.79	10.59	27.03	37.22	33.48	37	37	35	36.3333	38	38	38	38	35	35	35	35	36.5758
67	32.7591	17.3793	16.3386	22.159	38.87	75.92	6.98	19.9	25.83	75.97	8.57	20.51	26.67	76.61	7.44	21.82	26.72	26.4067	34	33	32	33	37	36	36	36.3333	36	35	33	34.6667	34.6667
76	30.1599	12.0305	18.5114	20.2339	39.95	76.01	6.37	22.19	27.1	75.19	8.44	24	29.45	72.15	9.21	24.02	31.79	29.4467	27	28	29	28	27	27	28	27.3333	27	27	28	27.3333	27.5758
83	23.242	10.9048	14.9009	16.3493	45.55	79.13	2.56	14.56	19.17	82.96	3.25	16.92	17.99	83.16	3.1	17.17	18.01	18.39	32	33	35	33.3333	33	35	34	34	32	31	32	31.6667	33.1212
85	31.6562	21.6705	45.1028	32.8098	42.46	79.23	2.68	18.31	21.44	82.16	4.33	20.02	21.05	78.22	4.87	20.45	24.02	22.17	34	34	35	34.3333	32	32	32	32	32	31	32	31.6667	32.7576
88	19.734	6.84391	15.9502	14.176	42.33	69.17	9.31	27.24	36	68.62	10.72	26.24	36.17	64.2	11.51	28.08	40.78	37.65	32	31	32	31.6667	34	33	34	33.6667	32	30	31	31	32.2121
97	18.4869	14.3312	24.8902	19.2361		87.09	1.84	14.86	13.64	87.33	1.77	14.79	13.41	86.7	2.26	14.86	13.92	13.6567	33	32	31	32	33	34	33	33.3333	33	32	33	32.6667	32.6667
109	48.6287	13.3268	22.071	28.0088	49	73.88	5.68	19374	26.94	76.67	7.26	21.58	26.47	74.44	7.08	21.47	27.92	27.11	38	40	40	39.3333	39	41	40	40	39	38	40	39	39.4848
112	41.7797	23.843	20.9509	28.8579	42.67	83.68	2.27	17.07	17.46	82.02	4.07	21.1	21.91	81.77	4.03	20.48	21.57	20.3133	30	31	31	30.6667	30	33	33	32	29	30	30	29.6667	30.8788
121	27.0359	29.6561	29.3651	28.6857	41.64	82.3	2.42	17.68	18.83	83.94	2.4	18.82	18.69	83.41	2.19	17.05	17.6	18.3733	27	27	27	27	27	27	27	27	26	26	27	26.3333	26.8182
139	25.6222	10.2892	17.1139	17.6751	43.53	81.16	3.79	18.91	20.73	81.83	4.9	18.07	19.95	81.51	4.82	19.15	20.91	20.53	33	37	37	35.6667	35	35	36	35.3333	33	33	32	32.6667	34.7273
140	33.0237	14.8112	27.7651	25.2	45.15	81.34	3.4	18.82	20.47	80.05	4.63	19.4	21.47	81.38	4.2	20.28	21.69	21.21	30	31	32	31	32	33	32	32.3333	31	31	31	31	31.4848
142	28.1536	26.5725	17.3454	24.0238	38.26	82.17	3.56	17.64	19.1	82.7	4.05	18.19	19.26	80.97	4.81	18.74	20.96	19.7733	28	34	33	31.6667	33	34	32	33	31	30	33	31.3333	32.0606
207	28.4896	17.7376	19.891	22.0394	42.13	79.15	5.25	18.61	22.21	79.08	6.16	26.05	27.98	78.98	6.33	21.47	24.6	24.93	27	30	31	29.3333	33	34	34	33.6667	31	31	32	31.3333	31.4545
220	26.4163	14.2971	14.7679	18.4938		82.75	2.74	18.89	19.51	84.27	2.79	18.03	17.93	85.13	2.67	16.93	16.54	17.9933	35	36	36	35.6667	37	37	37	37	35	35	36	35.3333	36.0606
223	25.6197	7.61622	11.6981	14.978	44.94	80.22	4.75	23.75	25.19	79.39	6.07	22.57	25.09	78.43	5.99	23.1	26.05	25.4433	32	34	33	33	35	34	35	34.6667	33	33	32	32.6667	33.5152
227	23.8913	13.2991	21.8116	19.6674	40.2	64.04	15.27	28.75	42.52	64.86	14.71	24.61	39.41	61.62	14.06	24.78	41.78	41.2367	41	38	40	39.6667	38	38	37	37.6667	33	33	35	33.6667	37.303
247	24.8846	9.51272	8.5427	14.3133	46.33	79.72	4.91	23.87	25.6	77.6	6.09	24.51	27.64	78.83	5.07	22.38	25.05	26.0967	38	36	35	36.3333	37	37	37	37	35	34	34	34.3333	36.0303
248	34.0666	8.47426	25.8803	22.807	42.43	76.91	7.34	14.3	22.08	71.56	10.09	20.91	30.65	70.95	10.2	22.39	31.98	28.2367	34	34	35	34.3333	32	34	33	33	35	36	36	35.6667	34.2121
260	22.3728	18.3603	20.0224	20.2518	39.39	79.64	5.59	15.75	20.16	77.99	5.88	17.76	22.68	78.7	5.92	16.87	21.62	21.4867	40	39	37	38.6667	41	38	38	39	40	41	41	40.6667	39.3333
269	23.9467	21.4921	17.0456	20.8281	42.78	73.88	7.24	23.71	29.82	73.72	8.7	24.45	30.82	71.58	9.04	24.92	32.72	31.12	32	34	32	32.6667	34	33	33	33.3333	31	31	29	30.3333	32.2727
284	11.5173	12.4593	13.803	12.5932	44.38	77.09	6.24	24.08	27.68	77.26	6.92	22.17	26.38	76.26	4.99	18.38	24.14	26.0667	35	34	35	34.6667	36	37	36	36.3333	35	33	35	34.3333	35.1818
285	18.0688	7.47711	28.8616	18.1358	41.74	68.84	12.91	26.07	36.65	68.92	12.64	26.42	36.7	67.22	12.45	26.86	38.12	37.1567	40	40	41	40.3333	39	38	39	38.6667	33	33	34	33.3333	37.8182
286	31.9602	17.3468	10.3248	19.8773	44.9	48.89	11.25	26.36	36.22	69.33	11.03	25.81	35.49	67.65	11.4	27.08	37.6	36.4367	36	36	38	36.6667	35	35	35	35	35	34	35	34.6667	35.5152
296	33.7864	17.1476	31.9368	27.6236	42.46	75.08	7.7	26.23	30.88	76.24	6.91	25.77	29.6	76.57	5.95	23.27	27.36	29.28	35	35	34	34.6667	37	36	35	36	32	32	31	31.6667	34.3333
298	18.2644	19.6658	31.7177	23.2159	39.93	77.95	6.51	21.7	25.48	77.55	7.04	20.56	25.12	76.93	6.89	19.72	24.96	25.1867	37	40	36	37.6667	31	31	31	31	35	33	35	34.3333	34.3333
	26.9495	15.1844	21.0746																			33.9667				34.3222				32.7444

## Sheet: 8day
egg number	PT				egg weight	pigment intensity of eggshell（8 d）												aver△E	thickness of eggshell(data/100)mm												average
						small				middle				large					small			average	middle			average	lagre			average
	small	middle	large	average		L	a	b	△E	L	a	b	△E	L	a	b	△E
4	26.0809	15.74	15.9081	19.243	43.09	73.17	8.66	18.97	27.88	74.25	8.15	17.72	26.2	73.89	8.28	20.98	28.37	27.4833	37	39	38	38	35	36	36	35.6667	36	35	36	35.6667	36.5152
23	13.5336	10.1868	13.0614	12.2606	41.28	76.23	7.86	22.97	27.9	78.45	6.73	19.22	23.53	77.84	6.99	18.79	23.76	25.0633	38	39	38	38.3333	38	38	38	38	37	37	37	37	37.8485
26	23.7775	10.1868	11.2729	15.0791	43.38	78.8	5.66	17.6	21.94	76.81	7.04	20.11	20.35	76.1	5.92	22.86	27.4	23.23	39	40	38	39	39	39	39	39	34	32	33	33	37.3636
44	20.1431	17.3951	10.7287	16.089	41.97	83.55	3.56	18.27	18.71	82.28	4.43	18.77	20.06	79.63	5.31	21.03	23.62	20.7967	33	34	34	33.6667	33	32	31	32	33	32	33	32.6667	32.7879
64	32.0104	17.3951	17.3425	22.2493	37.75	84.51	2.84	15.85	16.13	85.65	2.51	15.46	15.07	84.38	2.19	17.88	17.67	16.29	32	33	31	32	34	34	33	33.6667	33	36	36	35	33.4242
73	46.0493	22.9614	9.18798	26.0662	39.55	71.6	9.84	27.32	34.55	74.41	8.77	28.77	32.01	75.03	7.83	26.16	30.93	32.4967	36	35	36	35.6667	36	37	35	36	37	36	38	37	36.1515
75	25.3152	16.8854	12.6103	18.2703	39.84	81.31	3.59	19.01	21.34	81.95	3.57	19.27	20.46	81.38	3.42	20.52	21.74	21.18	32	33	32	32.3333	35	35	35	35	33	34	34	33.6667	33.6667
79	19.9989	16.8854	14.2235	17.0359	41.59	68.46	9.01	22.94	33.85	71.93	8.47	20.25	29.49	71.31	8.41	19.57	29.58	30.9733	34	35	34	34.3333	36	35	35	35.3333	35	35	35	35	34.8788
103	27.0416	13.1394	14.2396	18.1402	39.36	72.93	8.59	24.51	31.39	74.57	8.52	20.28	27.53	72.97	8.86	22.08	29.9	29.6067	31	32	32	31.6667	34	34	34	34	34	35	34	34.3333	33.2424
104	20.8526	13.6194	8.96277	14.4783	40.79	67.33	10.86	24.86	36.35	67.78	11.71	26.53	37.28	67.01	10.87	25.96	37.23	36.9533	38	38	35	37	37	36	39	37.3333	33	33	33	33	36.0303
130	13.1597	7.79561	6.57964	9.17832	45.97	69.6	10.07	16.94	30.23	69.99	10.02	20.58	31.66	70.75	8.71	19.75	30.21	30.7	42	44	44	43.3333	42	41	41	41.3333	37	38	38	37.6667	41.0606
154	19.602	8.54924	44.0203	24.0572	41.75	80.76	4	18.66	20.87	82.64	3.89	18.4	19.44	79.1	3.48	16.63	20.59	20.3	31	32	31	31.3333	33	33	32	32.6667	32	33	32	32.3333	32.0909
156	10.6828	13.4625	14.7449	12.9634	42.95	75.67	7.02	21.64	27.14	75.26	7.04	20.39	26.64	76.25	6.91	21.12	26.37	26.7167	38	40	42	40	40	39	37	38.6667	36	36	37	36.3333	38.5152
158	27.3558	13.4625	14.3543	18.3909	37.27	80.55	4.12	18.93	21.23	80.87	3.87	18.52	20.67	80.82	3.28	18.98	20.29	20.73	34	35	35	34.6667	33	35	35	34.3333	37	37	37	37	35.1818
163	27.0814	12.3111	16.277	18.5565	39.11	80.08	5.19	16.34	20.09	80.77	5.11	16.3	19.54	78.72	5.69	16.69	21.45	20.36	36	36	36	36	36	36	36	36	34	35	33	34	35.4545
172	40.4769	12.3111	27.5587	26.7823	42.39	81.92	4.61	18.14	19.87	83.39	4.1	18.66	19.23	83.08	3.56	19.65	20.07	19.7233	40	41	39	40	41	40	40	40.3333	41	40	38	39.6667	40.0303
174	30.7276	21.3449	17.0755	23.0493	44.11	82.54	3.92	17.89	19.13	80.3	5.26	19.76	22.25	78.94	5.09	21.67	23.76	21.7133	33	32	33	32.6667	35	35	35	35	32	31	32	31.6667	33.2424
182	13.4723	21.3449	12.7629	15.86	44.53	73.29	9.88	26.28	32.72	74.67	9.42	20.09	27.65	77.08	7.37	14.71	22.16	27.51	36	37	40	37.6667	43	42	43	42.6667	40	39	40	39.6667	40.0303
183	32.0756	12.7605	18.9524	21.2628	35.28	82.28	4.16	16.61	18.44	81.48	5.48	16.55	19.31	81.87	4.38	16.03	18.39	18.7133	32	33	32	32.3333	33	33	33	33	30	30	29	29.6667	31.8485
209	21.2229	12.7605	8.54917	14.1775	43.15	78.56	5.89	22.77	25.71	79.01	6.43	21.77	24.84	77.22	6.99	22.62	29.75	26.7667	40	41	38	39.6667	38	38	37	37.6667	37	36	37	36.6667	38.1212
210	20.8657	23.8508	20.367	21.6945	33.81	77.99	7.01	16.53	22.2	75.88	7.67	18.59	25.29	77.75	5.45	21.43	25.18	24.2233	33	32	32	32.3333	35	35	34	34.6667	35	35	36	35.3333	34
213	25.6198	23.8508	15.9583	21.8096	37.24	83.19	3.05	18.54	19.04	82.69	3.69	19.49	20.2	78.64	4.04	22.38	24.99	21.41	34	34	35	34.3333	32	32	33	32.3333	33	32	32	32.3333	33.0606
219	29.2263	24.6659	19.0525	24.3149	43.96	71.26	8.95	21.56	30.89	70.02	10.88	25.81	34.96	69.13	10.33	25.14	35.02	33.6233	38	40	35	37.6667	37	37	37	37	35	34	35	34.6667	36.6061
229	20.2323	24.6659	13.1021	19.3334	45.03	73.24	8.55	24.19	30.95	74.14	8.52	26.05	31.6	73.5	7.73	25.07	31.14	31.23	37	37	37	37	39	39	38	38.6667	39	39	38	38.6667	38.0606
233	28.9684	17.4722	12.6425	19.6944	37.1	84.62	2.97	14.82	15.33	84.53	3.62	14.41	15.26	85.25	3.03	12.45	13.29	14.6267	32	31	31	31.3333	31	30	30	30.3333	31	30	30	30.3333	30.697
255	24.6027	10.9222	19.5007	18.3419	39.71	82.13	3.06	21.61	22.09	80.96	4.15	23.44	24.42	78.93	4.65	24.68	26.67	24.3933	32	34	35	33.6667	35	35	34	34.6667	34	34	34	34	34.1212
261	17.155	15.6474	15.3585	16.0536	37.05	76.55	7.73	26.56	30.25	76.01	8	26.53	30.62	74.08	8.51	27.5	32.68	31.1833	30	31	32	31	35	34	34	34.3333	35	33	34	34	33.0303
282	24.3673	15.6474	13.9015	17.9721	42.46	79.02	5.69	17.54	21.75	80.85	5.1	20.64	22.5	81.65	4.49	21	22.16	22.1367	33	32	31	32	31	31	31	31	33	34	33	33.3333	32
283	18.4662	13.8669	12.8601	15.0644	42.4	78.09	6.98	20.91	24.98	78.63	6.6	21.34	24.82	77.92	6.44	20.97	24.99	24.93	34	34	35	34.3333	36	36	36	36	34	34	34	34	34.8485
300	19.439	9.75586	26.5545	18.5831	43.76	72.86	7.57	22.64	29.95	73.73	7.84	22.23	29.14	71.87	5.84	21.37	29.5	29.53	34	35	33	34	39	39	39	39	34	36	35	35	36.0909

## Sheet: 12day
egg number	PT				egg weight	pigment intensity of eggeshell（12 d）												aver△E	thickness of eggshell(data/100)mm												average
						small				middle				large					small			AVERAGE	middle			AVERAGE	large			AVERAGE
	small	middle	lagre	average		L	a	b	△E	L	a	b	△E	L	a	b	△E
7	23.7895	14.2763	14.3513	17.4724	38.63	79.16	4.56	16.63	20.61	79.48	6.22	16.96	21.21	78.23	4.47	18.69	22.81	21.5433	33	33	32	32.6667	34	33	33	33.3333	28	30	27	28.3333	31.7273
19	15.7185	16.0651	18.1941	16.6592	37.2	67.45	10.78	28.4	38.4	70.55	10.43	28.1	25.96	69.51	9.86	27.59	36.16	33.5067	30	34	31	31.6667	34	34	35	34.3333	32	32	32	32	32.7273
20	11.1894	11.4259	16.0485	12.8879	44.94	84.88	3.14	14.58	15.03	85.16	2.75	15.31	15.3	84.94	2.51	15.81	15.77	15.3667	37	37	36	36.6667	38	36	35	36.3333	36	34	34	34.6667	36
22	22.8922	17.6233	20.7552	20.4236	40.4	76.25	6.05	24.01	28.14	75.35	6.61	23.51	28.52	75.8	6.13	22.75	27.57	28.0767	39	39	33	37	36	37	38	37	32	34	33	33	35.9091
24	15.0955	12.0709	10.6948	12.6204	36.12	73.33	7.69	15.59	25.74	74.82	7.92	16.07	24.83	73.8	7	17.64	26.17	25.58	29	29	28	28.6667	31	31	31	31	30	30	30	30	29.8788
28	7.97948	9.64815	8.98164	8.86976	46.73	81.26	5.78	17.62	20.27	81.81	4.62	16.57	18.85	80.55	4.94	17.34	20.33	19.8167	38	38	34	36.6667	38	38	37	37.6667	35	35	34	34.6667	36.4848
29	17.1586	9.55024	8.53425	11.7477	38.5	81.08	4.94	17.55	20.1	81.49	5.42	17.87	20.19	80	5.18	18.68	21.67	20.6533	34	32	31	32.3333	35	35	36	35.3333	35	33	35	34.3333	33.9697
46	18.7009	11.7839	13.9656	14.8168	39.36	85.25	3.13	14.75	14.91	85.65	3.12	14.63	14.57	83.43	2.66	16.87	17.56	15.68	36	35	35	35.3333	34	33	36	34.3333	31	32	33	32	34.0606
62	15.1631	15.1727	16.0836	15.4731	37.46	81.91	4.62	17.31	19.3	82.67	4.39	17.42	18.81	81.17	4	17.81	19.99	19.3667	33	34	32	33	33	34	35	34	34	35	35	34.6667	33.8182
65	11.9461	7.90488	15.4881	11.7797	43.04	76.82	7.2	21.4	26.24	79.2	6.64	20.46	23.85	80.19	5.67	20.47	22.94	24.3433	39	38	35	37.3333	38	38	38	38	36	36	36	36	37.2121
81	34.398	24.0191	18.1145	25.5105	32.93	81.51	2.81	19.92	21.11	80.67	2.93	18.96	20.95	80.88	2.17	17.87	19.91	20.6567	23	23	23	23	22	22	22	22	26	25	24	25	23.1818
95	21.7504	13.394	15.9465	17.0303	38.44	76.76	6.92	20.31	25.48	77.12	7.01	20.68	25.5	75.75	6.71	21.76	27.09	26.0233	31	32	29	30.6667	33	33	33	33	31	31	31	31	31.6061
145	23.4551	11.3634	14.6539	16.4908	35.46	74.58	8.2	22.99	29.13	74.75	8.3	21.79	28.26	73.26	8.26	22.23	29.6	28.9967	34	33	34	33.6667	37	37	36	36.6667	37	36	32	35	35.1212
146	11.0011	10.8382	17.6483	13.1625	42.72	82.42	4.28	19.05	20.16	82.67	4.29	18.84	19.85	81.4	3.33	18.22	20	20.0033
157	19.6656	9.41379	12.8822	13.9872	37.32	74.35	6.89	27.41	32.03	73.39	8.66	21.48	29.16	72.79	8.05	19.42	28.23	29.8067	34	31	31	32	36	36	35	35.6667	35	35	34	34.6667	34.0606
161	33.0877	12.5216	15.2408	20.2834	39.26	73.55	7.63	25.53	31.39	75.26	8.2	25.44	30.35	75.53	7.45	25.11	29.66	30.4667	31	30	31	30.6667	38	36	36	36.6667	37	35	34	35.3333	34.1212
164	24.4031	12.7444	16.2747	17.8074	33.59	81.16	4.6	17.64	20.02	80.77	4.47	17.44	20.12	80.19	4.71	17.66	20.74	20.2933	31	31	29	30.3333	33	33	33	33	32	31	34	32.3333	31.8485
166	22.8004	11.2754	13.5371	15.8709	39.09	66.64	11.48	25.01	37.16	66.63	11.79	26.05	37.87	66.07	10.95	25.62	37.77	37.6	39	39	39	39	36	35	36	35.6667	31	32	35	32.6667	36.0606
175	14.1192	19.3272	19.3362	17.5942	41.25	71.69	9.64	25.3	33.08	70.9	9.54	22.43	31.85	70.61	9.32	21.89	31.69	32.2067	35	35	33	34.3333	35	35	34	34.6667	31	30	30	30.3333	33.3636
211	16.4948	13.8451	15.4036	15.2478	38.59	77.6	5.78	25.53	28.14	76.07	6.86	26.32	30.15	74.82	7.22	25.57	30.48	29.59	29	29	29	29	33	30	30	31	28	27	26	27	29.1818
212	24.7174	3.16025	4.98865	10.9554	42.29	70.71	10.13	26.77	34.86	71.79	8.89	21.43	31.26	70.05	9.67	25.09	34.12	33.4133	29	28	28	28.3333	30	30	30	30	28	27	26	27	28.5758
234	16.1156	18.0226	12.4498	15.5293	41.39	77.39	6.18	19.4	24.24	75.62	7.45	20.48	26.56	74.97	5.2	20.68	26.59	25.7967	34	33	31	32.6667	31	32	30	31	31	30	30	30.3333	31.4242
238	17.0411	12.2568	13.0249	14.1076	38.04	84.47	3.01	17.57	17.36	85.27	2.98	16.5	16.2	85.19	3.82	16.64	16.32	16.6267	35	35	35	35	35	35	35	35	36	33	34	34.3333	34.8182
256	21.8707	14.7189	13.4976	16.6957	39.15	82.99	2.92	19.95	20.24	81.87	4.08	19.03	20.88	82.47	3	18.61	19.53	20.2167	32	31	30	31	36	35	34	35	28	29	29	28.6667	31.8182
258	17.5786	12.2737	14.4794	14.7772	37.97	78.48	7.24	19.85	24.09	76.74	8.03	18.98	25.01	77.1	7.48	18.83	24.47	24.5233	30	30	30	30	33	34	35	34	31	31	31	31	31.7273
265	18.9281	11.2157	12.0805	14.0747	48.4	71.49	9.51	25.58	33.16	73.69	9.16	22.63	29.82	72.71	9.19	24.38	31.63	31.5367	32	32	32	32	36	35	38	36.3333	34	35	34	34.3333	34.2121
266	29.3598	11.3654	24.3909	21.7054	43.52	85.94	1.2	41.46	13.91	86.44	2.23	15.37	14.48	86.67	1.75	14.9	13.89	14.0933	35	34	34	34.3333	34	34	33	33.6667	31	31	31	31	33.1818
275	36.6373	27.9536	26.9641	30.5183	42.32	76.37	7.56	51.56	26.76	76.51	7.74	18.92	25.04	76.31	6.7	22.16	26.96	26.2533	32	31	33	32	36	37	36	36.3333	36	32	34	34	34.1212
280	21.5482	8.52547	8.14274	12.7388	47.33	77.48	7.46	20.07	24.98	75.93	8.08	21.14	26.65	74.72	7.51	23.65	29.28	26.97	32	33	34	33	36	37	36	36.3333	34	34	34	34	34.4848
																														32.0595

## Sheet: 16day
egg number	PT				egg weight	pigment intensity of eggshell（16 d）												aver△E	thickness of eggshell(data/100)mm
						small				middle				lagre					small			AVERAGE	middle			AVERAGE	lagre			AVERAGE
	small	middle	lagre	average		L	a	b	△E	L	a	b	△E	L	a	b	△E
58	15.429	9.49635	6.45572	10.4604	44.56	73.5	8.13	23.03	29.89	74.28	8.17	23.1	29.39	73.93	7.54	21.61	28.51	29.2633	38	37	36	37	35	35	35	35	35	36	36	35.6667
63	13.4739	8.95679	12.7126	11.7144	39.19	74.87	7.91	25.74	30.73	75.06	7.57	25.08	30.05	73.85	7.82	26.49	31.91	30.8967	34		35	34.5	33	33	32	32.6667	33	34	36	34.3333
86	15.1365	14.3005	17.4472	15.6281	40.26	85.41	2.51	19.85	18.78	85.81	1.73	19.01	17.74	81.48	0.83	17.11	15.7	17.4067	36	35	35	35.3333	33	34	33	33.3333	31	31	31	31
99	18.2213	11.7815	16.6422	15.5483	31.61	82.22	4.72	18.31	19.83	83.83	3.88	17.8	18.25	82.31	3.25	18.21	18.74	18.94	39	32	38	36.3333	40	41	41	40.6667	38	38	36	37.3333
100	32.349	15.3609	15.5904	21.1001	34.88	84.87	2.51	25.56	15.61	84.95	3.06	16.59	16.46	83.08	2.69	18.03	18.64	16.9033	26	25	27	26	32	32	30	31.3333	31	31	31	31
114	17.3624	17.0665	16.3913	16.94	35.4	81.25	3.42	16.27	18.76	81.21	4.43	17.05	19.54	80.98	3.54	16.46	19.1	19.1333	32	33	32	32.3333	33	34	33	33.3333	31	30	31	30.6667
122	13.8	8.49997	14.4456	12.2485	33.91	76.69	6.48	19.44	24.85	77.48	7.14	19.58	24.56	76.56	7.16	21.2	26.26	25.2233	34	33	34	33.6667	33	32	33	32.6667	31	30	30	30.3333
128	4.37551	10.3999	7.59669	7.45737	38.74	63.07	11.85	24.79	39.91	68.14	9.88	20.53	33.06	67.91	9.94	19.95	32.98	35.3167	34	35	37	35.3333	34	33	34	33.6667	33	35	34	34
129	11.1968	20.0841	11.3138	14.1983	38.52	80.99	4.48	20.94	22.58	81.25	4.83	18.71	20.76	81.31	4.76	21.05	22.45	21.93	34	35	34	34.3333	34	34	35	34.3333	33	33	33	33
131	18.5625	9.64817	16.0291	14.7466	39.58	76.21	6.42	23.35	27.78	76.95	6.7	23.33	27.34	75.47	5.53	22.76	27.66	27.5933	35	36	39	36.6667	36	34	35	35	36	36	37	36.3333
133	13.9493	12.9867	20.0782	15.6714	37.1	78.8	5.8	25	27.23	82.05	4.14	22.08	22.7	81.77	2.57	20.75	21.54	23.8233	31	31	31	31	31	32	32	31.6667	32	33	32	32.3333
134	12.6615	11.9302	15.1844	13.2587	42.5	76.15	6.42	22.16	27	76.08	7.22	79.81	25.74	75.01	6.88	18.44	25.62	26.12
137	12.362	8.54855	12.8971	11.2692	37.72	78.37	7.2	18.59	23.33	79.07	7.49	15.22	20.93	76.97	7	17.79	23.79	22.6833	35	37	37	36.3333	39	39	39	39	35	36	36	35.6667
143	34.8154	14.959	23.9537	24.576	35.48	79.84	3.09	19.05	21.59	79.97	3.66	21.09	23.09	77.48	3.09	20.99	24.6	23.0933	28	28	28	28	30	30	31	30.3333	33	31	32	32
150	17.4914	11.3533	11.4037	13.4162	45.63	77.62	6.96	21.99	26.03	78.61	5.4	24.42	26.8	77.76	4.46	25.92	28.29	27.04	35	33	34	34	36	36	35	35.6667	36	36	37	36.3333
153	12.1397	10.2117	8.40848	10.2533	37.57	78.34	6.35	14.11	20.51	78.04	7.1	16.28	22.15	74.57	6.45	18.54	25.9	22.8533	35	35	35	35	32	33	33	32.6667	31	32	33	32
168	9.04078	12.1447	14.7035	11.963	45.66	78.63	6.14	22.97	25.87	75.65	7.33	24.09	28.9	75.94	6.44	23.02	23.73	26.1667	33	34	34	33.6667	39	39	38	38.6667	33	33	33	33
177	10.5924	10.1152	17.106	12.6045	39.76	69.24	10.88	27.92	36.86	69.11	10.93	26.6	36.13	64.63	12.13	28.48	40.89	37.96	34	35	34	34.3333	31	33	35	33	31	31	31	31
197	15.6561	17.7168	19.8971	17.7567	36.35	82.39	2.1	19.86	20.39	83.63	2.96	20.05	19.95	82.95	2.23	19.98	20.18	20.1733	31	29	31	30.3333	29	29	30	29.3333	29	28	28	28.3333
203	12.3325	8.25754	11.1011	10.5637	41.03	72.29	9.31	27.95	34.36	69.93	10.09	28.46	36.51	68.78	10.62	29.29	38	36.29	29	33	32	31.3333	35	37	35	35.6667	35	32	33	33.3333
221	24.7448	9.75079	10.3053	14.9336	40.84	82.32	3.55	19.42	20.34	82.26	3.52	20.29	21.04	83.64	2.73	18.66	18.8	20.06	38	40	38	38.6667	34	35	34	34.3333	31	30	27	29.3333
222	10.5062	8.37927	16.0944	11.6599	42.9	66.74	11.54	28.88	39.43	66.45	12.12	28.82	39.79	67.47	10.9	28.61	38.55	39.2567	39	36	36	37	36	35	36	35.6667	40	39	39	39.3333
225	10.8898	9.62321	17.564	12.6924	39.05	73.98	8.7	23.53	30.04	73.97	8.58	24.09	30.38	76.7	7.27	24.59	28.56	29.66	33	33	33	33	36	34	35	35	35	36	37	36
231	16.1987	11.3571	15.7859	14.4472	37.33	85.23	3.27	18.19	17.62	84.76	3.13	19.01	18.52	83.94	2.29	18.55	18.46	18.2	32	32	31	31.6667	34	35	35	34.6667	34	34	34	34
243	9.44821	13.1382	11.1628	11.2497	38.08	76.22	6.93	22.6	27.11	76.28	7.4	22.52	27.41	76.14	5.89	19.97	25.43	26.65	36	35	37	36	35	34	34	34.3333	34	33	35	34
244	14.4261	10.9618	10.3919	11.9266	39.03	71.31	9.58	19.37	29.84	72.01	7.73	12.93	25.81	67.81	8.87	19.72	32.62	29.4233	31	32	32	31.6667	32	32	33	32.3333	30	31	31	30.6667
251	19.1611	7.79538	11.8776	12.9447	42.64	84.96	3.05	14.22	14.69	82.78	4.09	6.83	18.24	83.25	3.33	17.57	18.31	17.08	37	37.5	38	37.5	36	38	37	37	37	36	37	36.6667
252	22.1918	6.44893	6.10419	11.5816	40.92	74.72	7.59	25.46	30.55	73.86	9.38	26.43	32.3	72.29	8.67	16.62	33.26	32.0367	33	32	33	32.6667	31	31	31	31	31	31	32	31.3333
254	10.1048	11.8111	11.1277	11.0145	40.54	80.27	5.88	20.14	22.7	81.14	5.4	21.27	22.87	80.46	4.92	20.79	22.81	22.7933	34	33.5	33	33.5	36	35	36	35.6667	36	37	36	36.3333
259	13.7386	10.0195	12.8219	12.1933	38.19	79.47	3.85	18.68	21.73	81	4.61	18.37	20.64	80.77	3.56	17.84	20.19	20.8533	31	30	32	31	33	32	33	32.6667	31	33	32	32

## Sheet: 21day
egg number	PT				pigment intensity of eggshell（21 d）												aver△E	thickness of eggshell(data/100)mm
					small				middle				lagre					small			AVER	middle			AVER	large			AVER
	a	b	c	average	L	a	b	△E	L	a	b	△E	L	a	b	△E
5	39.783	25.0047	25.6389	30.1422	76.49	3.73	24.79	28.11	76.64	4.47	23.7	27.32	75.44	6.02	24.01	28.67	28.0333	31	30	30	30.3333	32	33	33	32.6667	31	30	30	30.3333
16	39.0889	27.7611	45.5001	37.45	83.34	1.64	16.09	16.88	80.28	1.76	13.63	17.62	81.77	1.57	13.4	16.25	16.9167	38	35	37	36.6667	37	38	37	37.3333	34	34	32	33.3333
30	17.2914	21.5965	20.2669	19.7182	81.6	4.32	17.53	19.4	82.22	4.24	16.64	18.52	82.04	4.43	18.73	20.18	19.3667	30	29	30	29.6667	33	32	30	31.6667	31	33	32	32
52	26.5643	16.6763	21.6467	21.6291	85.48	1.77	16.84	18.13	84.91	2.4	17.86	17.38	84.53	1.84	17.68	17.37	17.6267	36	38	36	36.6667	31	32	33	32	32	31	33	32
53	39.3708	16.8687	15.2233	23.8209	75.03	6.22	22.88	28.22	74.04	7.34	25.06	31.66	69.49	9.37	78.46	36.62	32.1667	33	34	33	33.3333	32	31	31	31.3333	34	34	32	33.3333
56	24.8719	15.4034	23.4646	21.2466	68.36	6.07	25.17	34.56	73.61	7.43	25.76	31.46	74.27	7.78	24.86	30.48	32.1667	32	33	32	32.3333	31	32	33	32	28	28	29	28.3333
68	52.0796	28.8204	21.3239	34.0747	79.81	2.15	16.9	20.01	81.71	3.54	20.27	21.36	79.53	4.43	22.82	24.67	22.0133	31	30	31	30.6667	33	33	33	33	33	34	33	33.3333
72	18.4501	13.7722	16.4551	16.2258	76.67	5.63	19.42	23.99	75.98	5.63	19.42	23.99	76.73	5.68	18.43	23.97	23.9833	34	37	37	36	34	35	33	34	34	33	33	33.3333
84	15.465	11.0922	17.1261	14.5611	73.39	7.75	24.4	30.46	73.77	8.27	23.93	30.32	71.83	7.92	22.99	31.02	30.6	38	40	38	38.6667	41	39	40	40	39	40	39	39.3333
96	36.2373	25.2029	23.9018	28.4473	76.37	5.64	24.48	28.3	76.56	6.16	25.31	28.81	72.97	6.44	24.23	30.62	29.2433	30	31	31	30.6667	33	32	33	32.6667	31	31	31	31
105	11.5191	6.0367	17.0014	11.5191					74.41	6.12	24.65	29.83	76.83	5.81	21.23	25.75	27.79					34	35	35	34.6667	33	35	33	33.6667
117	21.1286	8.9188	22.6676	17.5717	71.36	7.26	26.8	33.68	71.78	8.5	26.77	33.67	71.23	8.35	25.53	33.19	33.5133	34	35	37	35.3333	35	35	34	34.6667	30	29	30	29.6667
120	20.4246	9.98743	15.206	15.206	73.99	7.87	17.59	26.25	74.38	8.29	17.69	26.13					26.19	33	34	33	33.3333	40	40	39	39.6667
123	17.9756	15.836	20.1153	17.9756					74.36	7.24	24.17	29.81	71.6	7.58	24.89	32.3	31.055	32	32	31	31.6667					30	30	29	29.6667
169	28.3362	17.1869	23.3438	22.9556	72.47	8.07	20.46	29.27	73.51	8.55	21.08	28.79	72.49	8.24	22.09	30.02	29.36	33	31	33	32.3333	34	35	34	34.3333	35	34	33	34
181	25.1419	18.5653	28.8003	24.1692	68.45	9.74	28.02	37.15	67.65	10.49	27.73	37.74	68.2	9.13	28.7	37.61	37.5	36	36	34	35.3333	36	35	36	35.6667	33	34	31	32.6667
194	38.0989	9.78078	29.6255	25.835	70.76	7.06	25.54	33.21	69.69	8.13	26.16	34.64	71.18	8.95	26	33.68	33.8433	31	33	32	32	30	31	31	30.6667	33	32	31	32
195	46.4534	28.1624	34.004	36.2066	73.81	5.94	22.31	28.63	73.19	6.54	24.86	30.91	70.95	7.64	26.02	33.51	31.0167	28	27	28	27.6667	29	27	27	27.6667	31	31	31	31
196	25.7302	21.399	22.9806	23.3699	65.82	10.76	20.97	35.43	64.59	10.23	25.31	38.53	68.34	10.28	19.05	32.3	35.42	31	31	31	31	31	31	31	31	32	32	33	32.3333
201	23.8006	15.8937	16.4913	18.7285	72.22	7.54	26.6	33.01	72.23	7.6	26.43	32.89	72.29	7.92	27.16	33.44	33.1133	30	29	28	29	28	26	26	26.6667	26	27	27	26.6667
215	21.5969	21.4099	25.4941	22.8336	73.67	8.78	25.33	31.49	74.66	8	25.55	30.76	73.89	7.4	24.99	30.73	30.9933	34	32	33	33	37	35	35	35.6667	35	35	34	34.6667
257	21.6286	21.0983	20.568	21.0983	70.43	5.49	22.5	31.22					75.8	6.05	21.24	26.53	28.875	33	31	31	31.6667					31	32	32	31.6667
268	37.3648	30.5822	33.0596	33.6689	79.43	3.3	19.21	22.03	81.75	3.3	17	18.88	81.88	2.6	16.05	18.74	19.8833	28	28	27	27.6667	29	28	29	28.6667	28	28	27	27.6667
271	29.2887	19.3975	30.8002	26.4955	72.05	7.11	27.26	33.48	69.41	8.21	27.42	35.68	69.45	6.63	27.69	35.48	34.88	39	38	38	38.3333	36	36	36	36	35	35	35	35
274	32.3138	41.3807	27.0864	33.5936	78.57	4.28	19.03	22.7	76.98	4.26	20.11	24.55	78.88	5.49	19.97	23.38	23.5433	29	29	30	29.3333	30	30	30	30	30	29	29	29.3333
297	26.6374	23.9702	34.1617	28.2565	79.63	3.26	21.58	23.61	79.72	4.07	18.84	21.71	79.63	3.81	19.11	21.91	22.41	38	37	36	37	36	36	36	36	34	36	35	35
299	40.8434	17.1418	15.1984	24.3945	77.29	3.87	21.87	25.47	77.08	4.03	17.47	22.76	79.41	4.73	16.32	20.44	22.89	34	33	33	33.3333	35	35	35	35	32	32	32	32

## Sheet: before and after fumigation
before and after fumigation
before						after
average△E	L	a	b			average△E	L	a	b
29.8067	73.3767	9.28	22.2033			30.2867	71.0033	8.77667	20.4733
34.1967	69.15	11.48	23.17			34.6067	67.71	11.5033	21.86
27.5033	75.8933	7.24667	22.3367			27.8033	74.5367	7.65333	21.1467
31.0567	74.6967	8.02	25.98			31.43	72.6433	8.45	24.3567
27.6133	75.31	6.50333	22.13			28.25	73.3533	6.76333	20.7733
33.48	71.7567	9.26	26.1033			33.76	69.7733	8.97667	24.4767
26.4067	76.1667	7.66333	20.7433			26.2733	74.7	7.65	18.4467
29.4467	74.45	8.00667	23.4033			30.1933	73.24	8.78	21.5533
18.39	81.75	2.97	16.2167			18.9367	80.3233	3.93	15.15
22.17	79.87	3.96	19.5933			22.4867	78.06	4.06333	18.17
37.65	67.33	10.5133	27.1867			36.45	66.9233	11.0667	24.4
13.6567	87.04	1.95667	14.8367			14.3667	85.0767	1.75	14.1933
27.11	74.9967	6.67333	21.4233			27.86	72.8267	6.09	19.4467
20.3133	82.49	3.45667	19.55			19.5167	81.4667	7.28	17.3933
19.1567	83	3.74	18.37			19.74	79.99	3.68333	16.2567
18.3733	83.2167	2.33667	17.85			18.4833	81.5367	2.61	16.3967
20.53	81.5	4.50333	18.71			20.8633	80.3267	5.4	17.7333
21.21	80.9233	4.07667	19.5			21.3533	80.2633	4.66667	18.6567
19.7733	81.9467	4.14	18.19			20.1867	80.84	4.98667	17.4267
22.6233	78.07	6.96667	17.2333			22.45	77.2933	7.58667	15.6233
24.93	79.07	5.91333	22.0433			22.7567	78.2533	6.04	18.1067
17.9933	84.05	2.73333	17.95			18.0233	81.2833	2.55333	15.4333
25.4433	79.3467	5.60333	23.14			24.9333	78.4367	6.26	21.2733
41.2367	63.5067	14.68	26.0467			41.38	63.08	15.5933	25.0667
28.2333	74.31	7.5	21.5167			27.5033	72.5233	7.00667	18.15
26.0967	78.7167	5.35667	23.5867			25.4967	77.4	5.36333	21.5967
28.2367	73.14	9.21	19.2			26.26	73.1067	9.44667	15.3467
21.4867	78.7767	5.79667	16.7933			22.35	76.7	5.99333	15.3567
31.12	73.06	8.32667	24.36			31.1367	71.81	8.55667	22.8767
26.0667	76.87	6.05	21.5433			23.36	76.9533	5.55333	17.2633
37.1567	68.3267	12.6667	26.45			37.3867	67.2333	12.8367	25.4233
36.4367	61.9567	11.2267	26.4167			37.3867	67.2333	12.8367	25.4233
29.28	75.9633	6.85333	25.09			27.21	74.0233	6.36333	20.0967
25.1867	77.4767	6.81333	20.66			25.5167	76.6267	7.08667	19.6267
						0	0	0	0
